# Supplementary material for: Effects of GLP-1 on Forearm Vasodilator Function and Glucose Disposal During Hyperinsulinemia in the Metabolic Syndrome
Source: PubMed Central journal article supplement — Diabetes Care. 2013 Feb 13;36(3):683–9. doi: 10.2337/dc12-0763 (PMC3579378; doi:10.2337/dc12-0763), 2013-02-13
Supplement: supp_dc12-0763v120763_DC120763SupplementaryData.pdf [file supp_dc12-0763v120763_DC120763SupplementaryData.pdf]

SUPPLEMENTARY DATA

**Supplementary Figure 1:**

*Protocol 1: Assessment of the effects of GLP-1 on vascular reactivity during hyperinsulinemia in MetS patients and in controls.*

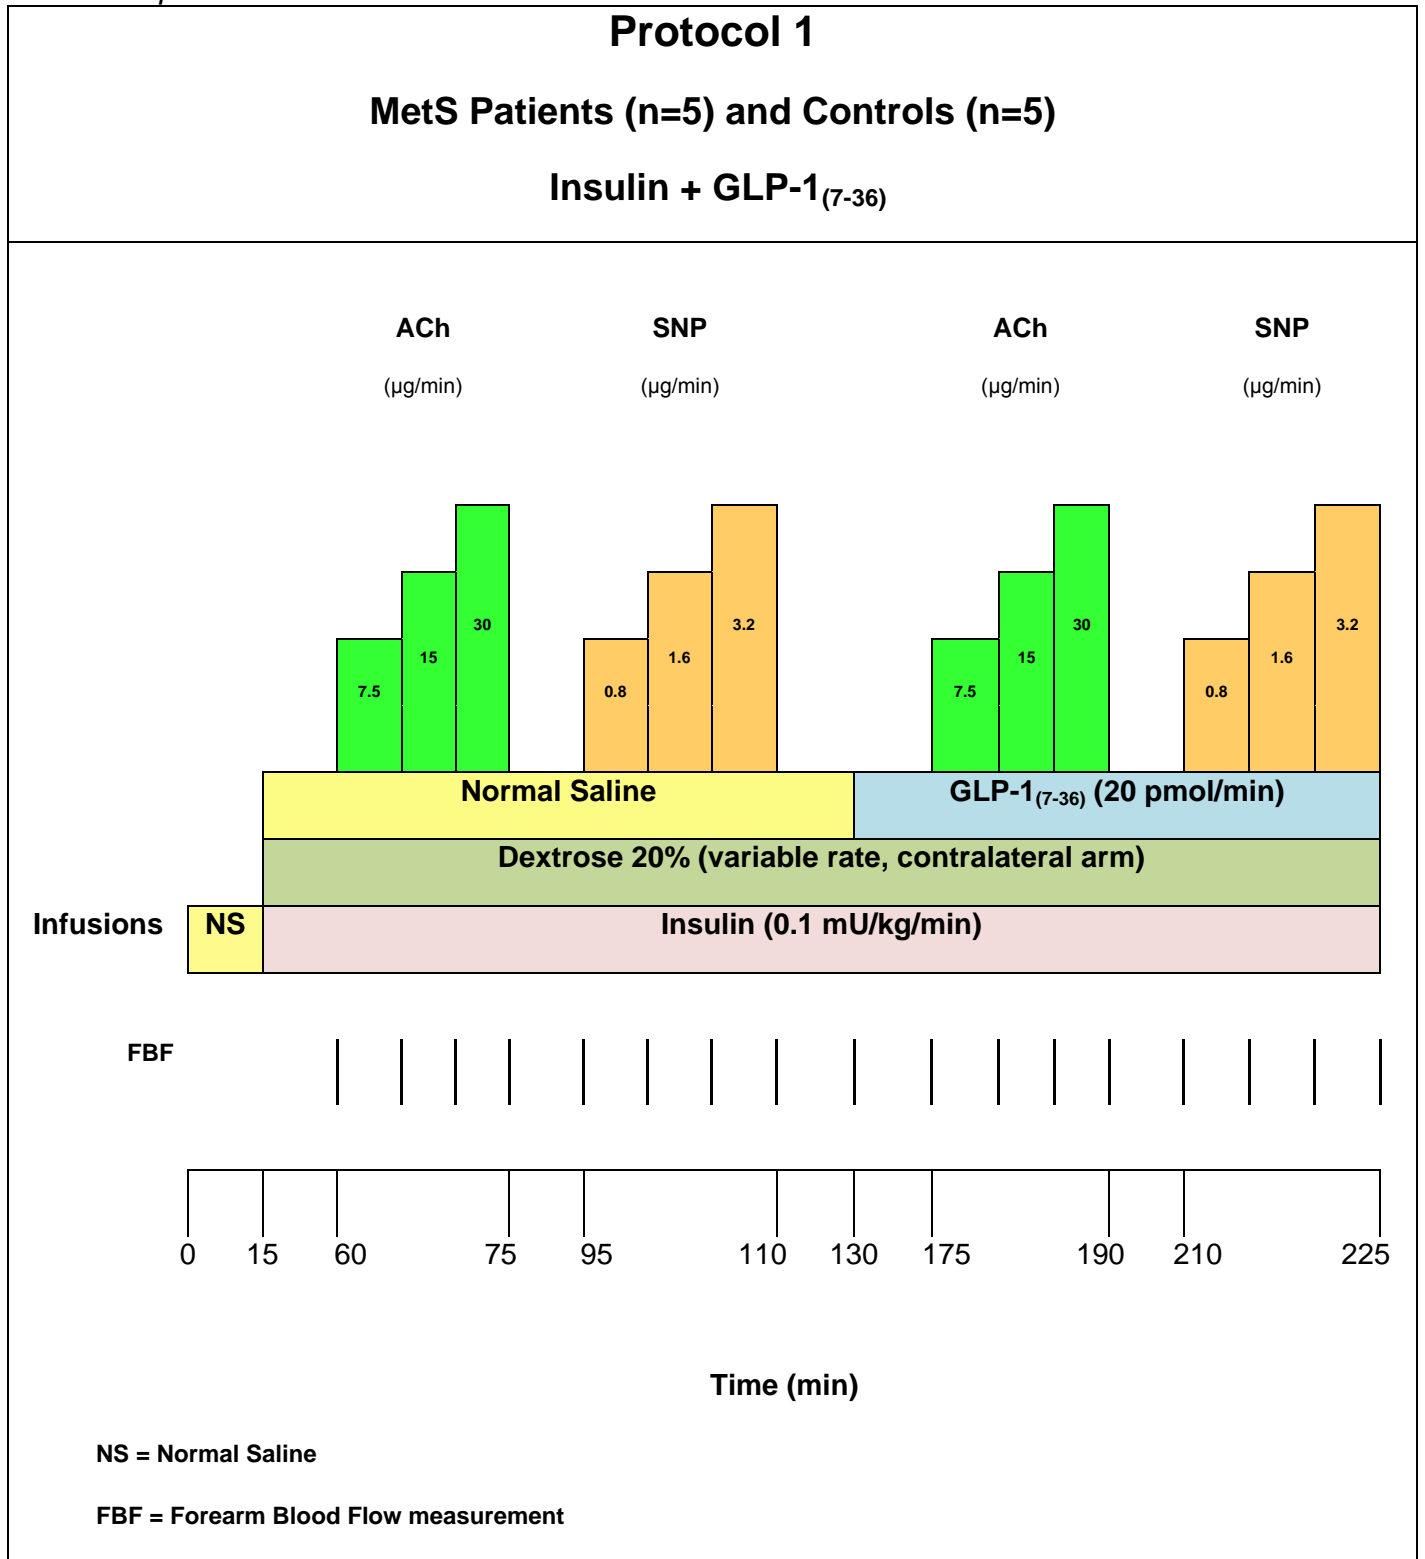

SUPPLEMENTARY DATA

**Supplementary Figure 2:**

*Protocol 2: Assessment of the effects of GLP-1 on vascular reactivity of MetS patients in the Absence of Hyperinsulinemia.*

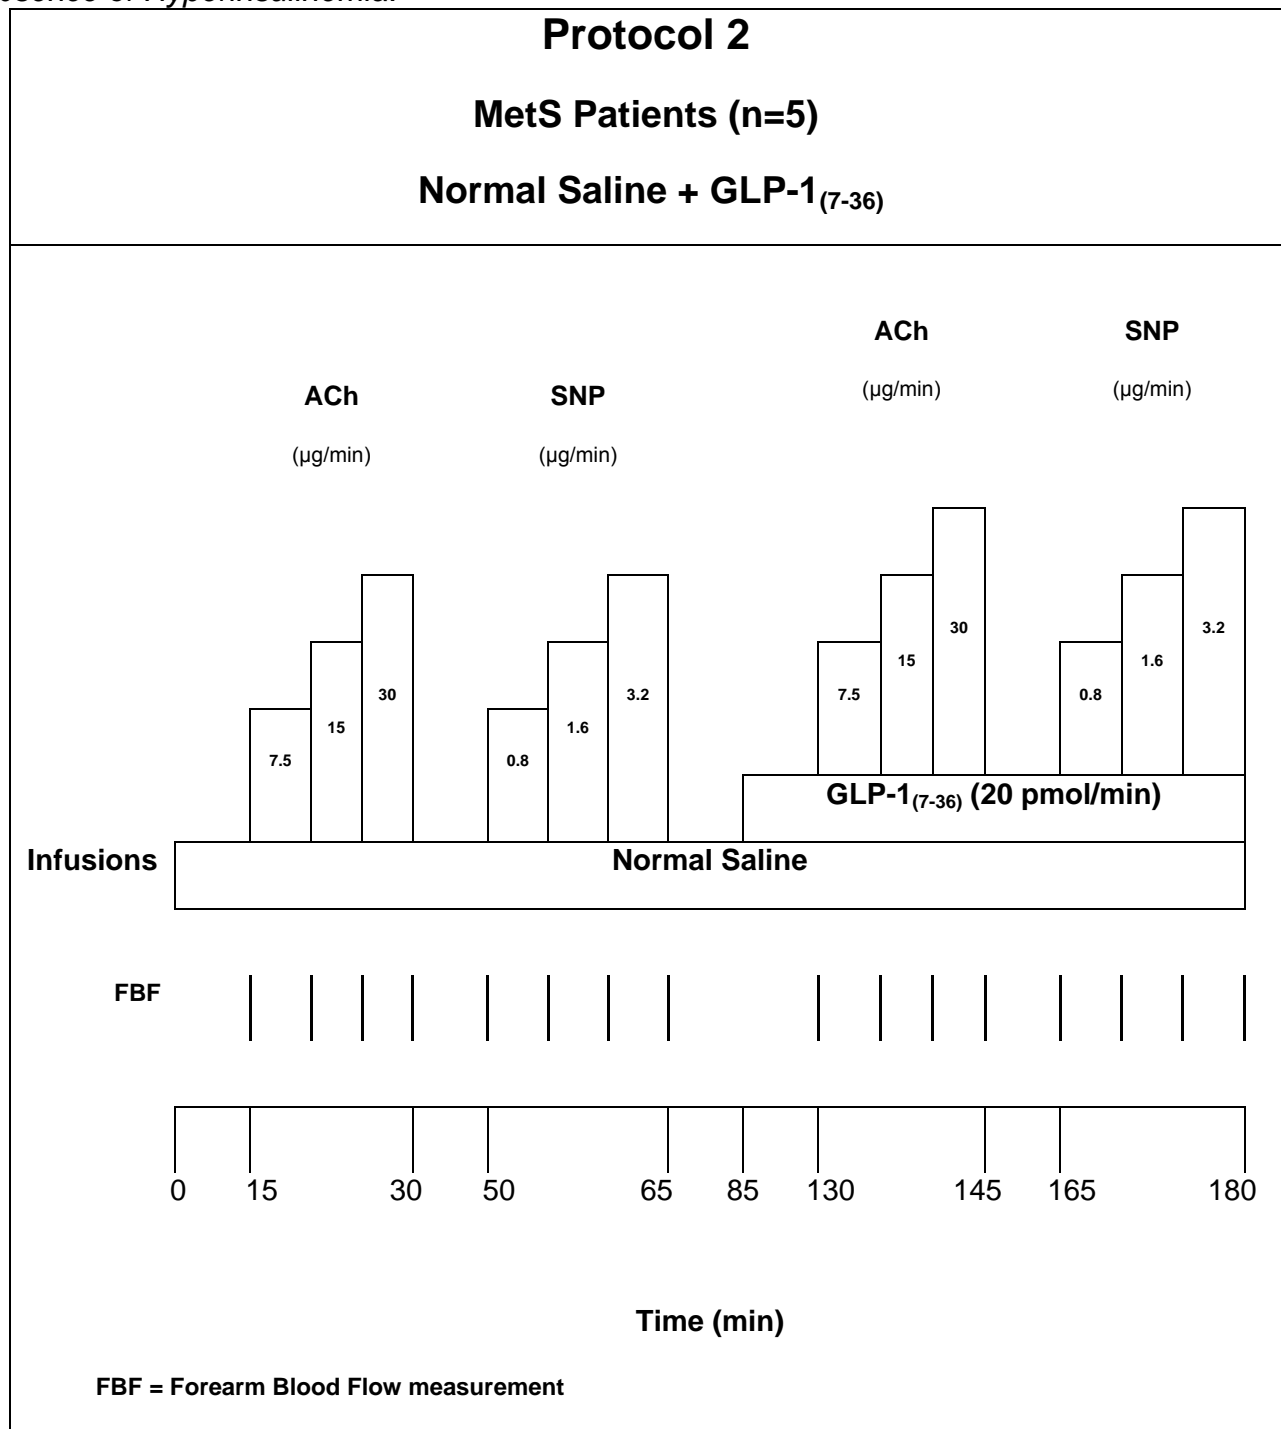

SUPPLEMENTARY DATA

**Supplementary Figure 3:**

*Protocol 3: Assessment of the effect of GLP-1 on vasodilator function during hyperinsulinemia and vitamin C infusion in Mets patients.*

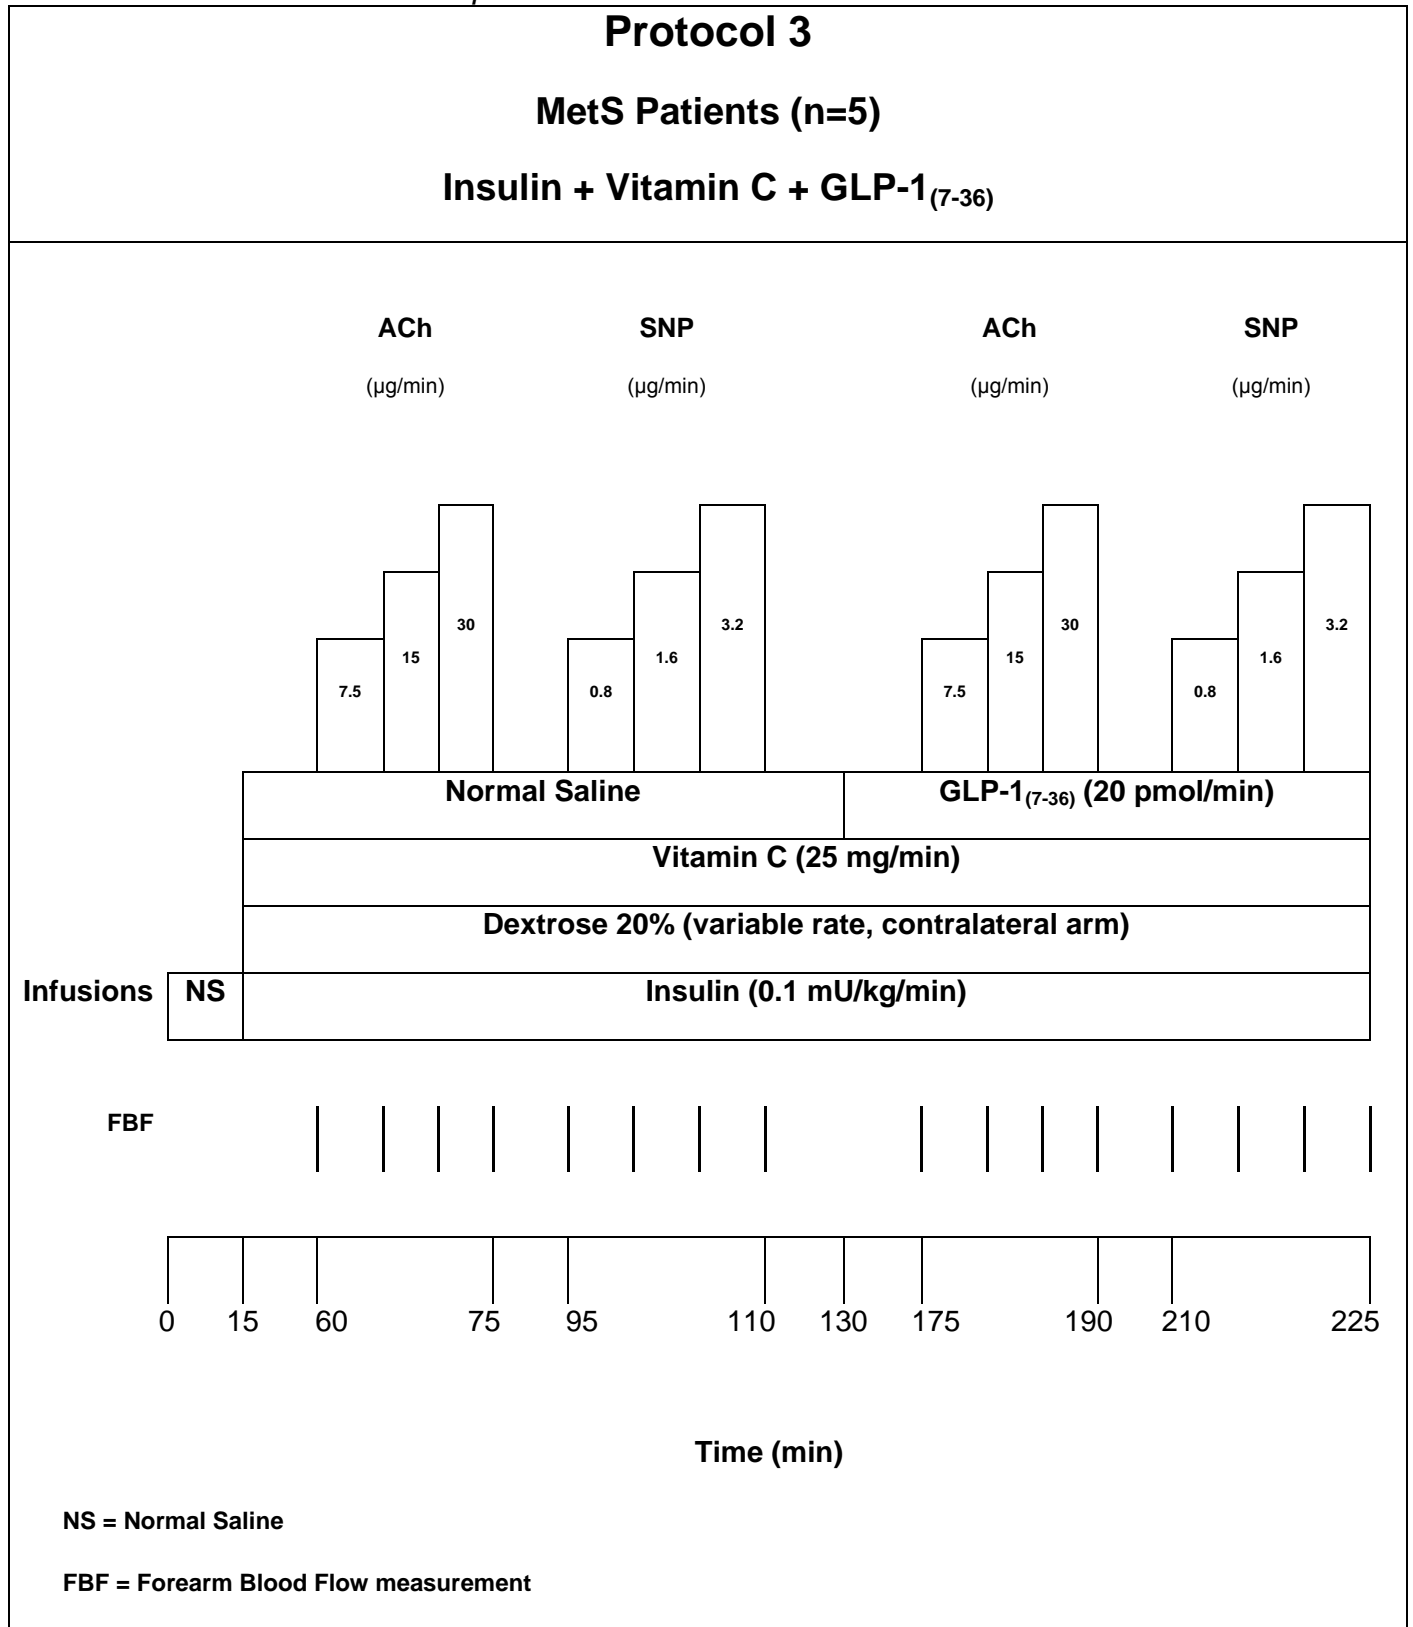

SUPPLEMENTARY DATA

**Supplementary Figure 4:**

*Protocol 4: Assessment of the effects of the metabolite GLP-1(9-36) on vascular reactivity during hyperinsulinemia in MetS patients.*

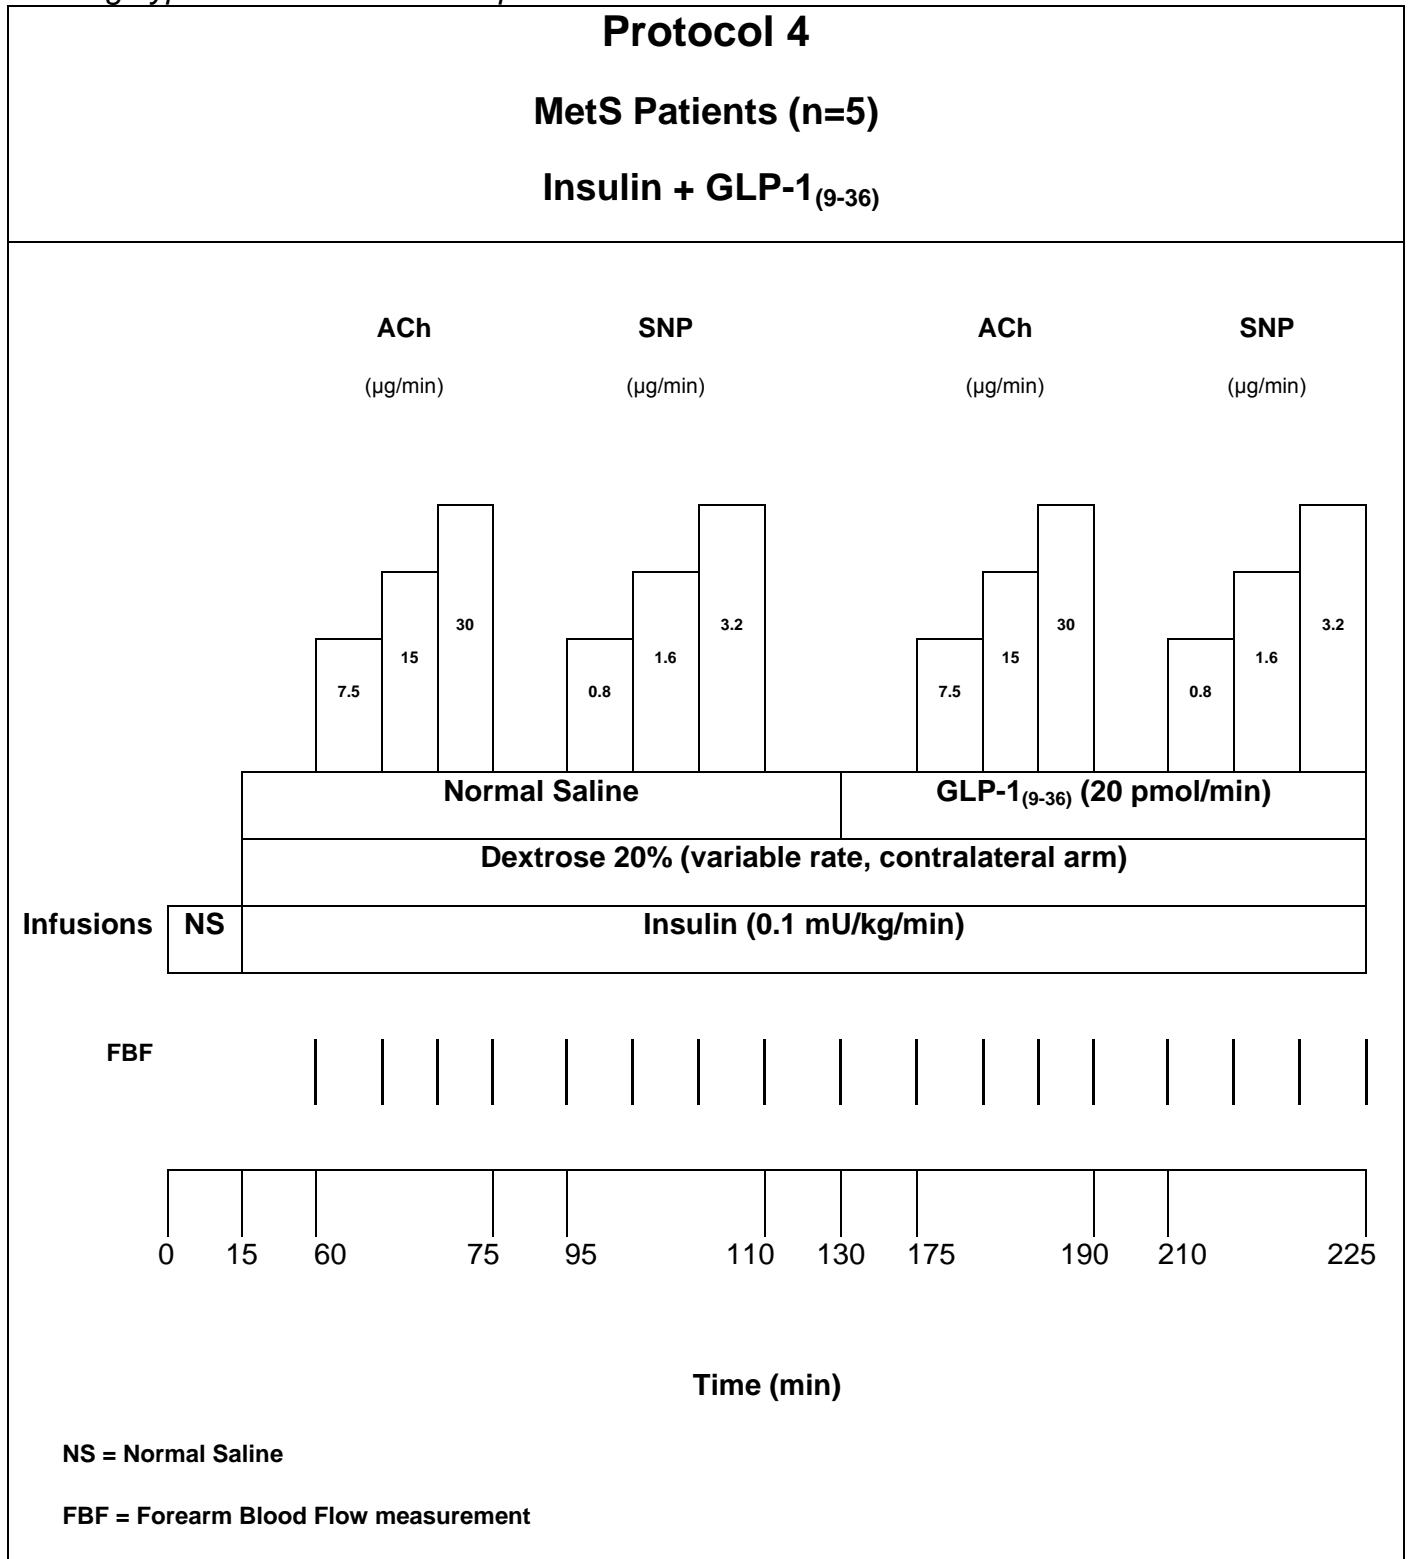

SUPPLEMENTARY DATA

**Supplementary Figure 5:**

Protocol 5. Assessment of the effects of GLP-1 on forearm glucose disposal during hyperinsulinemia in MetS patients.

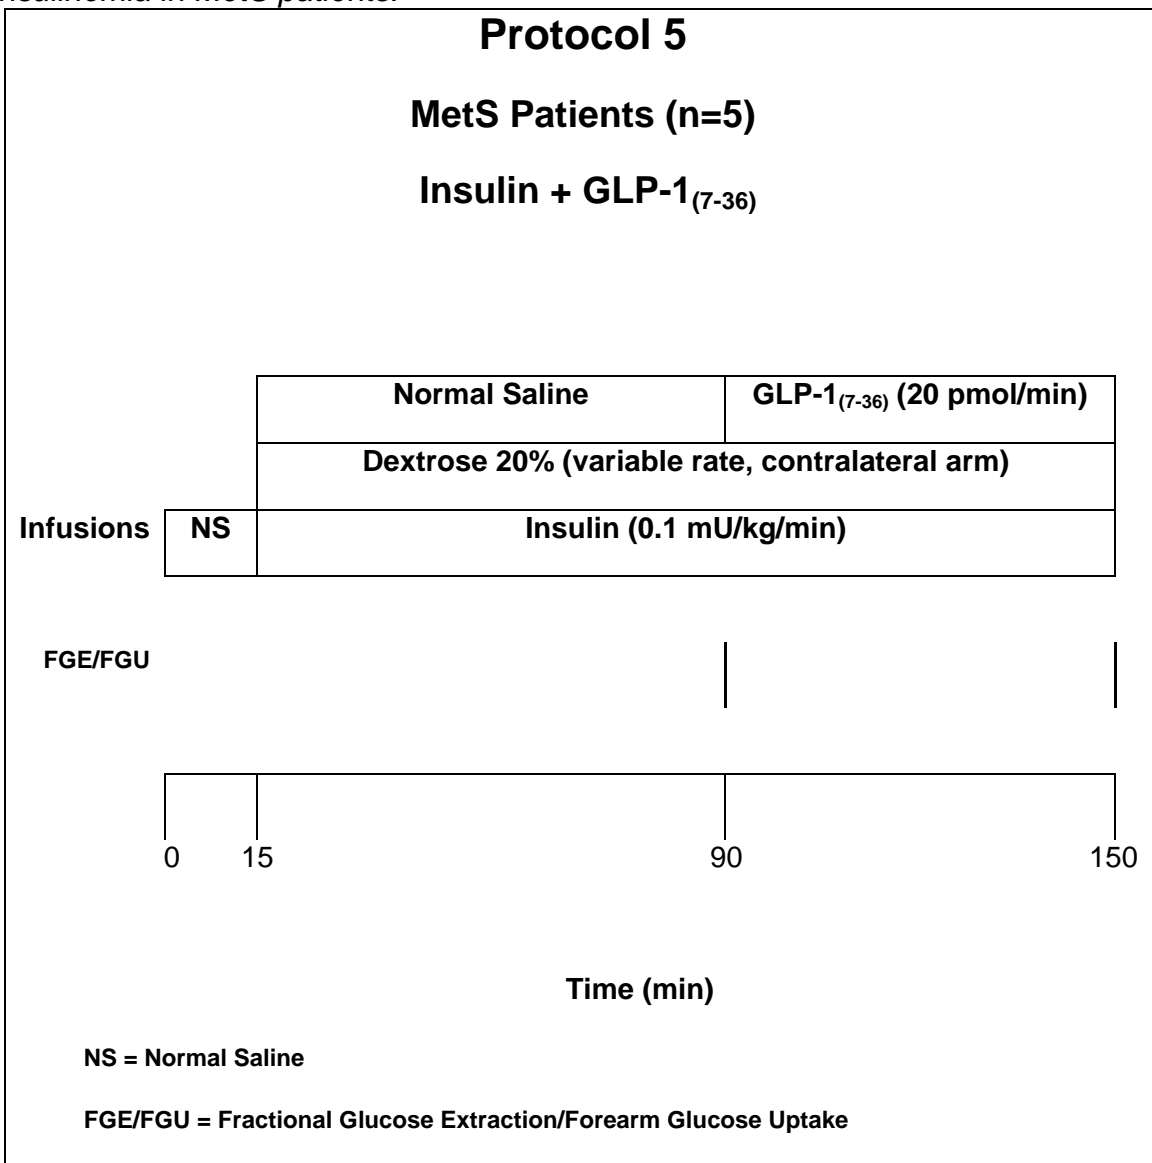

SUPPLEMENTARY DATA

**Supplementary Table 1.** Clinical Characteristics of the Study Population

|                                   | <i>Controls</i> | <i>Metabolic Syndrome</i> |                |
|-----------------------------------|-----------------|---------------------------|----------------|
|                                   | (n=5)           | (n=25)                    | <i>P value</i> |
| <i>Sex (m/f)</i>                  | 2/3             | 12/13                     |                |
| <i>Age (years)</i>                | 45±3            | 46±2                      | 0.54           |
| <i>BMI (kg/m<sup>2</sup>)</i>     | 38±4            | 40±2                      | 0.61           |
| <i>Waist (cm)</i>                 | 119±6           | 120±3                     | 0.81           |
| <i>Smoking (yes/no)</i>           | 4/1             | 21/4                      | 0.84           |
| <i>MAP (mmHg)</i>                 | 97±2            | 106±2                     | 0.01           |
| <i>Total Cholesterol (mmol/L)</i> | 4.87±0.10       | 5.31±0.21                 | 0.24           |
| <i>HDL Cholesterol (mmo/L)</i>    | 1.37±0.10       | 1.09±0.05                 | 0.01           |
| <i>Triglycerides (mmo/L)</i>      | 1.31±0.18       | 1.94±0.16                 | 0.04           |
| <i>Glucose (mmo/L)</i>            | 5.05±0.05       | 5.88±.22                  | 0.07           |

Data are expressed as mean±SEM. BMI: body mass index; MAP: mean arterial pressure; HDL: high-density lipoprotein.

There was no significant difference in any of the variables among the 5 MetS groups.
